# Supplementary material for: Crosstalk of dynamic functional modules in lung development of rhesus macaques
Source: Royal Society of Chemistry journal article supplement (doi:10.1039/c5mb00881f), 2016-02-18
Supplement: c5mb00881f2.pdf [file c5mb00881f2.pdf]

Table S1 the biological processes of lung three developmental stages

| Stage        | GO Biological Process                                                      | References          |
|--------------|----------------------------------------------------------------------------|---------------------|
| Early stage  | GO:0007049~cell cycle                                                      | [1], [2], [3]       |
|              | GO:0006260~DNA replication                                                 |                     |
|              | GO:0006412~translation                                                     |                     |
|              | GO:0048146~positive regulation of fibroblast proliferation                 |                     |
| Middle stage | GO:0030036~actin cytoskeleton organization                                 | [4], [5], [6], [7], |
|              | GO:0016192~vesicle-mediated transport                                      | [8], [9]            |
|              | GO:0048754~branching morphogenesis of a tube                               |                     |
|              | GO:0048514~blood vessel morphogenesis                                      |                     |
|              | GO:0002520~immune system development                                       |                     |
|              | GO:0035295~tube development                                                |                     |
|              | GO:0030323~respiratory tube development                                    |                     |
|              | GO:0048660~regulation of smooth muscle cell proliferation                  |                     |
| Late stage   | GO:0006955~immune response                                                 | [10], [11], [12],   |
|              | GO:0070302~regulation of stress-activated protein kinase signaling pathway | [13]                |
|              | GO:0006954~inflammatory response                                           |                     |
|              | GO:0010647~positive regulation of cell communication                       |                     |
|              | GO:0042592~homeostatic process                                             |                     |

- Ranganathan S (2010) Lung development, lung growth and the future of respiratory medicine. *Eur Respir J* 36 (4):716-717. doi:10.1183/09031936.00070210
- Ramasamy SK, Mailleux AA, Gupte VV, Mata F, Sala FG, Veltmaat JM, Del Moral PM, De Langhe S, Parsa S, Kelly LK, Kelly R, Shia W, Keshet E, Minoo P, Warburton D, Bellusci S (2007) Fgf10 dosage is critical for the amplification of epithelial cell progenitors and for the formation of multiple mesenchymal lineages during lung development. *Dev Biol* 307 (2):237-247. doi:10.1016/j.ydbio.2007.04.033
- Morrissey EE, Cardoso WV, Lane RH, Rabinovitch M, Abman SH, Ai X, Albertine KH, Bland RD, Chapman HA, Checkley W, Epstein JA, Kintner CR, Kumar M, Minoo P, Mariani TJ, McDonald DM, Mukoyama YS, Prince LS, Reese J, Rossant J, Shi W, Sun X, Werb Z, Whitsett JA, Gail D, Blaisdell CJ, Lin QS (2013) Molecular determinants of lung development. *Ann Am Thorac Soc* 10 (2):S12-16. doi:10.1513/AnnalsATS.201207-036OT
- Jesudason EC, Smith NP, Connell MG, Spiller DG, White MR, Fernig DG, Losty PD (2005) Developing rat lung has a sided pacemaker region for morphogenesis-related airway peristalsis. *Am J Respir Cell Mol Biol* 32 (2):118-127. doi:10.1165/rcmb.2004-0304OC
- Volckaert T, Campbell A, Dill E, Li C, Minoo P, De Langhe S (2013) Localized Fgf10 expression is

- not required for lung branching morphogenesis but prevents differentiation of epithelial progenitors. *Development* 140 (18):3731-3742. doi:10.1242/dev.096560
6. Kallapur SG, Presicce P, Senthamaikannan P, Alvarez M, Tarantal AF, Miller LM, Jobe AH, Choungnet CA (2013) Intra-amniotic IL-1 $\beta$  induces fetal inflammation in rhesus monkeys and alters the regulatory T cell/IL-17 balance. *J Immunol* 191 (3):1102-1109. doi:10.4049/jimmunol.1300270
  7. Karamariti E, Margariti A, Winkler B, Wang X, Hong X, Baban D, Ragoussis J, Huang Y, Han JD, Wong MM, Sag CM, Shah AM, Hu Y, Xu Q (2013) Smooth muscle cells differentiated from reprogrammed embryonic lung fibroblasts through DKK3 signaling are potent for tissue engineering of vascular grafts. *Circ Res* 112 (11):1433-1443. doi:10.1161/CIRCRESAHA.111.300415
  8. Wu WX, Ma XH, Smith GC, Nathanielsz PW (2000) Differential distribution of ER $\alpha$  and ER $\beta$  mRNA in intrauterine tissues of the pregnant rhesus monkey. *Am J Physiol Cell Physiol* 278 (1):C190-198
  9. Sun T, Jayatilake D, Afink GB, Ataliotis P, Nister M, Richardson WD, Smith HK (2000) A human YAC transgene rescues craniofacial and neural tube development in PDGFR $\alpha$  knockout mice and uncovers a role for PDGFR $\alpha$  in prenatal lung growth. *Development* 127 (21):4519-4529
  10. Rosenwirth B, Kuhn EM, Heeney JL, Hurpin C, Tartaglia J, Bonnet MC, Moingeon P, Erdile L (2001) Safety and immunogenicity of ALVAC wild-type human p53 (vCP207) by the intravenous route in rhesus macaques. *Vaccine* 19 (13-14):1661-1670
  11. Bhaskaran M, Didier PJ, Sivasubramani SK, Doyle LA, Holley J, Roy CJ (2013) Pathology of Lethal and Sublethal Doses of Aerosolized Ricin in Rhesus Macaques. *Toxicol Pathol.* doi:10.1177/0192623313492248
  12. Mattson JR, Roberts M, Patterson R (1974) Respiratory immune response to aerosolized keyhole limpet hemocyanin in primate lungs. *Infect Immun* 9 (4):708-713
  13. Guillot L, Nathan N, Tabary O, Thouvenin G, Le Rouzic P, Corvol H, Amselem S, Clement A (2013) Alveolar epithelial cells: Master regulators of lung homeostasis. *Int J Biochem Cell Biol* 45 (11):2568-2573. doi:10.1016/j.biocel.2013.08.009
